# Supplementary material for: Asymmetric synthesis of α-amino acids: indium-mediated reactions of glyoxylic oxime ether in aqueous mediaElectronic supplementary information (ESI) available: typical procedures for allylation reaction and isopropyl radical addition reaction. See http://www.rsc.org/suppdata/cc/b2/b203493j/
Source: Royal Society of Chemistry journal article supplement (doi:10.1039/b203493j), 2002-06-06
Supplement: b203493j.doc [file b203493j.doc]

# Supplementary data

**Asymmetric synthesis of -amino acids: Indium-mediated reactions of glyoxylic oxime ether in aqueous media**

Hideto Miyabe, Azusa Nishimura, Masafumi Ueda, and Takeaki Naito*

# Kobe Pharmaceutical University, Motoyamakita, Higashinada, Kobe 658-8558, Japan

**General.** 1H and 13C NMR spectra were recorded at 500 MHz, and at 125 MHz, respectively. Mass spectra were obtained by EI method. Preparative TLC separations were carried out on precoated silica gel plates (E. Merck 60F254).

o

**Typical procedure for allylation of oxime ether 1** (Scheme 1, 2)

To a micro tube containing **1** (50 mg, 0.13 mmol), RX (0.33 mmol), THF (0.3 mL) and H2O (0.3 mL) was added indium (47 mg, 0.33 mmol) at 20 oC. After being stirred at the same temperature for 2 h, the reaction mixture was diluted with saturated aqueous NaHCO3 and then extracted with CH2Cl2. The organic phase was dried over MgSO4 and concentrated at reduced pressure. Purification of the residue by preparative TLC (hexane:AcOEt=4:1) afforded **2a-e**.

For an example, **2a**: a colorless crystal; mp 108-109 oC (AcOEt/hexane); []24D +112.1 (c 0.99, CHCl3); 1H NMR (CDCl3) 7.37-7.26 (5H, m), 6.16 (1H, br d, *J*=11.0 Hz), 5.78-5.70 (1H, m), 5.09-5.02 (2H, m), 4.76, 4.72 (2H, AB q, *J*=12.0 Hz), 4.49-4.44 (1H, br m), 3.97 (1H, br t, *J*=6.0 Hz), 3.50, 3.47 (2H, AB q, *J*=14.0 Hz), 2.41-2.29 (2H, m), 2.10-2.04 (2H, m), 1.92-1.86 (3H, m), 1.44-1.33 (2H, m), 1.14, 0.97 (each 3H, s); 13C NMR (CDCl3) 173.0, 137.8, 132.7, 128.6, 128.2, 127.6, 118.3, 75.9, 65.1, 62.4, 53.0, 48.6, 47.8, 44.6, 38.3, 34.8, 32.8, 26.4, 20.8, 19.9; HRMS calcd for C22H30N2O4S (M+) 418.1925, found 418.1929.

**Typical procedure for alkylation of oxime ether 1** (Scheme 3, 4)

To a micro tube containing **1** (50 mg, 0.13 mmol), RI (1.33 or 5.32 mmol), and indium (189 mg, 1.33 mmol) was added dropwise H2O (0.5 mL) at 20 oC. After being stirred at the same temperature for 48 h, the reaction mixture was diluted with aqueous 36% potassium sodium (+)-tartrate and then extracted with CH2Cl2. The organic phase was dried over MgSO4 and concentrated at reduced pressure. Purification of the residue by preparative TLC (hexane:AcOEt=4:1) afforded **2f-h**.

For an example, **2f**: a colorless crystal; mp 83-84 oC (Et2O/hexane); []29D +103.6 (c 1.11, CHCl3); 1H NMR (CDCl3) 7.39-7.24 (5H, m), 6.22 (1H, d, *J*=11.0 Hz), 4.69, 4.63 (2H, AB q, *J*=14.0 Hz), 4.17-4.10 (1H, br m), 3.99 (1H, br t, *J*=6.0 Hz), 3.49, 3.48 (2H, AB q, *J*=14.0 Hz), 2.15-2.03 (2H, m), 1.95-1.83 (4H, m), 1.48-1.30 (2H, m), 1.13, 0.97 (each 3H, s), 1.01, 0.86 (each 3H, d, *J*=7.0 Hz); 13C NMR (CDCl3) 174.3, 138.0, 128.8, 128.1, 127.5, 75.6, 68.1, 65.1, 53.1, 48.4, 47.8, 44.6, 38.5, 32.9, 30.3, 26.5, 20.7, 20.0, 17.9; HRMS calcd for C22H33N2O4S(M+ + H) 421.2159, found 421.2150.
